# Supplementary material for: Effect of High-Temperature Hydrothermal Treatment on the Cellulose Derived from the Buxus Plant
Source: MDPI journal article supplement (doi:10.3390/polym14102053), 2022-05-18
Supplement: s1 [file s1]

**!1-XX**

Author: METTLER TOLEDO  
Date: 2021/11/8  
Database: STAR Default DB V16.30: METTLER

**METTLER TOLEDO**

## Evaluation: !1-XX, 08.11.2021 18:50:08

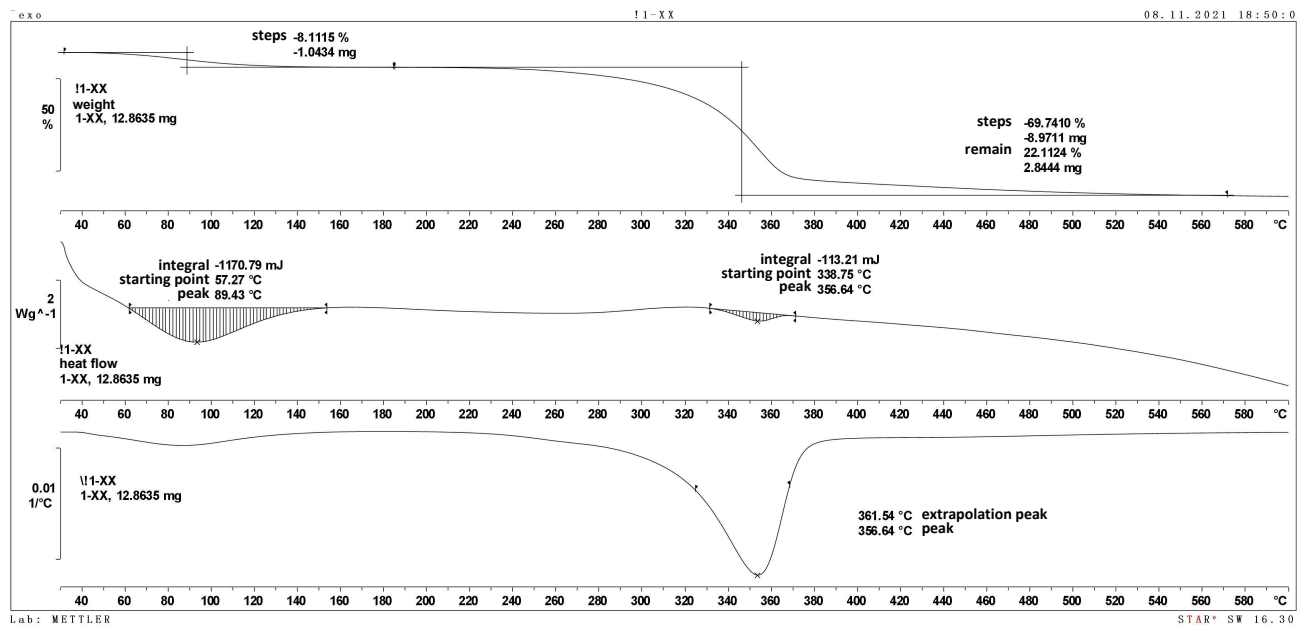

**Curve:** !1-XX, 08.11.2021 18:50:08

**Sample:** 1-XX, 12.8635 mg

**Sample Holder:** Alumina 70ul  
Ceramic

**Method:** Central South  
Forest-Lignin  
dt 1.00 s  
[1] 30.0..600.0 °C, 30.00 K/min, N2 50.0 ml/min  
**Sync Enable**

**Module:** TGA/DSC 3+ LF/1100/1024, 12.07.2021 13:32:05

**User:** METTLER

**Curve:** !1-XX, 08.11.2021 18:50:08

**Sample:** 1-XX, 12.8635 mg

**Sample Holder:** Alumina 70ul  
Ceramic

**Method:** Central South  
Forest-Lignin  
dt 1.00 s  
[1] 30.0..600.0 °C, 30.00 K/min, N2 50.0 ml/min  
**Sync Enable**
